# Supplementary material for: Design of molecularly imprinted hydrogels with thermoresponsive drug binding sites
Source: Royal Society of Chemistry journal article supplement (doi:10.1039/d2tb00325b), 2022-01-01
Supplement: d2tb00325b1.pdf [file d2tb00325b1.pdf]

## Supporting Information

# Design of Molecularly Imprinted Hydrogels with Thermoresponsive Drug Binding Sites

*Yuto Toyoshima,* <sup>a</sup> *Akifumi Kawamura,* <sup>a,b</sup> *Yoshinori Takashima,* <sup>c</sup> and *Takashi Miyata,* <sup>\*a,b</sup>

<sup>a</sup> Department of Chemistry and Materials Engineering, Kansai University, 3-3-35, Yamate-cho, Suita, Osaka 564-8680, Japan.

<sup>b</sup> Organization for Research and Development of Innovative Science and Technology, Kansai University, 3-3-35, Yamate-cho, Suita, Osaka 564-8680, Japan

<sup>c</sup> Department of Macromolecular Science, Graduate School of Science, Osaka University, 1-1 Machikaneyama-cho, Toyonaka, Osaka 560-0043, Japan.

\*Corresponding author: [tmiyata@kansai-u.ac.jp](mailto:tmiyata@kansai-u.ac.jp)

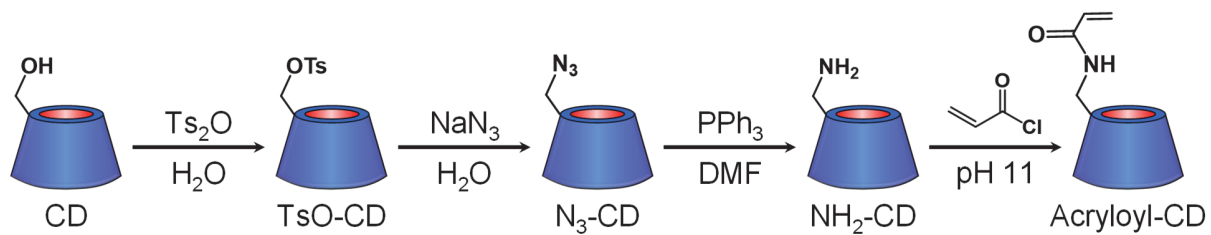

Scheme S1. Synthesis of acryloyl-CD.

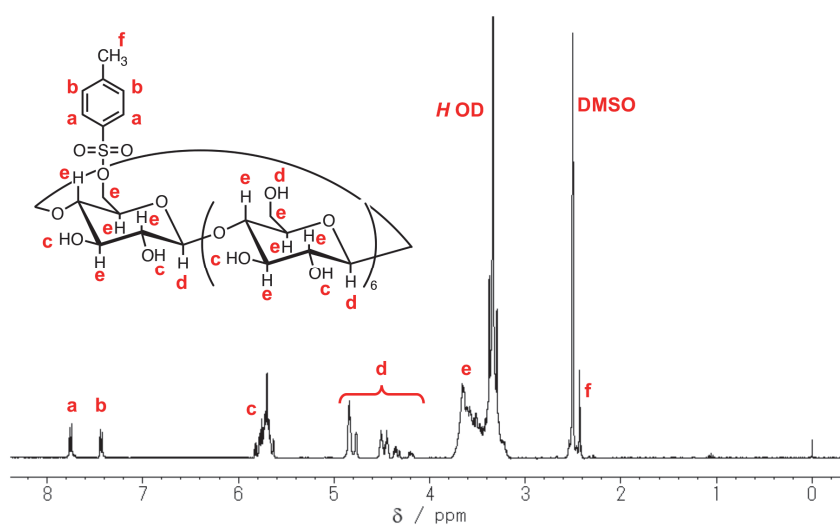

Fig. S1. <sup>1</sup>H NMR spectrum of TsO-CD (400 MHz, DMSO-*d*<sub>6</sub>).

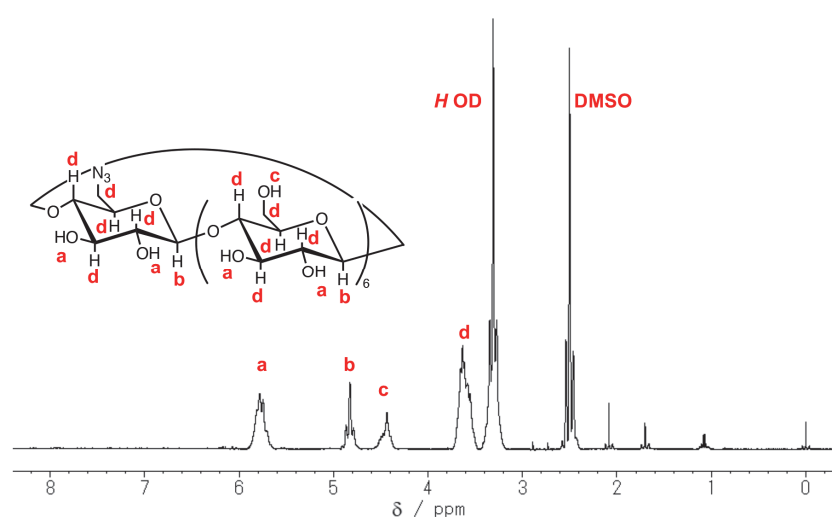

Fig. S2. <sup>1</sup>H NMR spectrum of N<sub>3</sub>-CD (400 MHz, DMSO-*d*<sub>6</sub>).

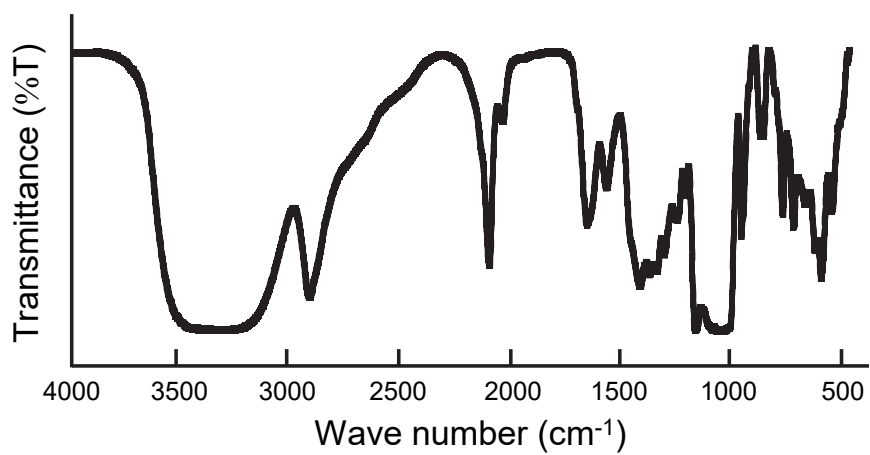

Fig. S3. FT-IR spectrum of N<sub>3</sub>-CD.

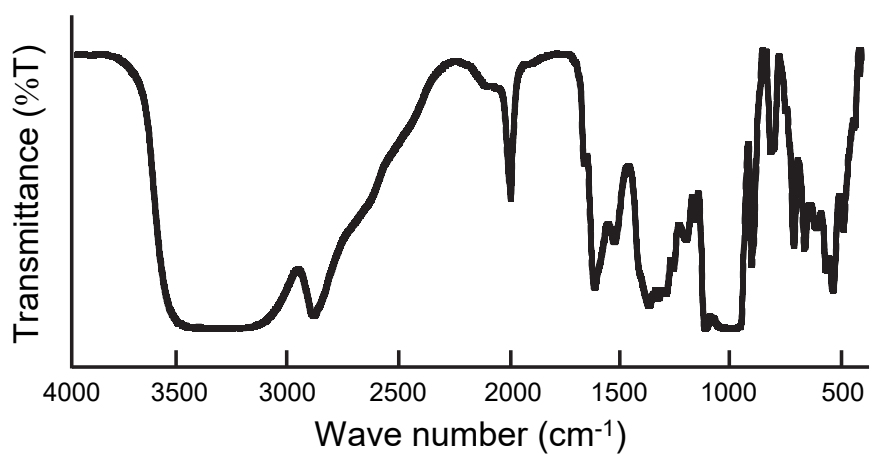

Fig. S4. FT-IR spectrum of NH<sub>2</sub>-CD.

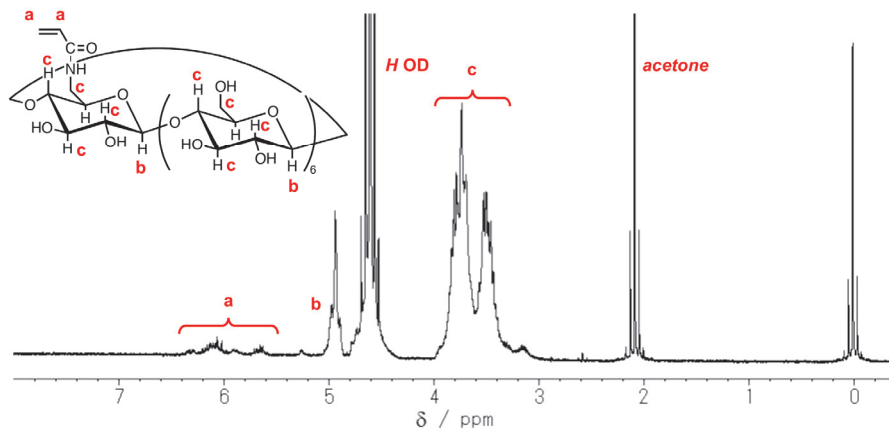

Fig. S5.  $^1\text{H}$  NMR spectrum of Acryloyl-CD (400 MHz,  $\text{D}_2\text{O}$ ).

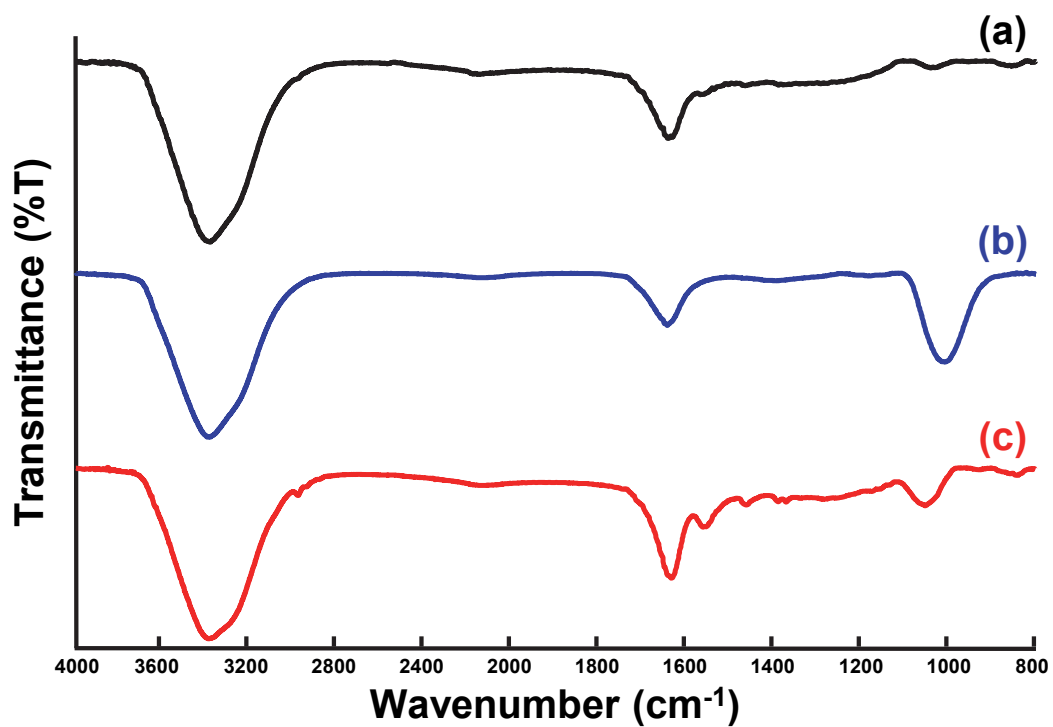

Fig. S6. FT-IR spectra of (a) PNIPAAm hydrogel, (b)  $\beta$ -CD and (c) MIP hydrogel.

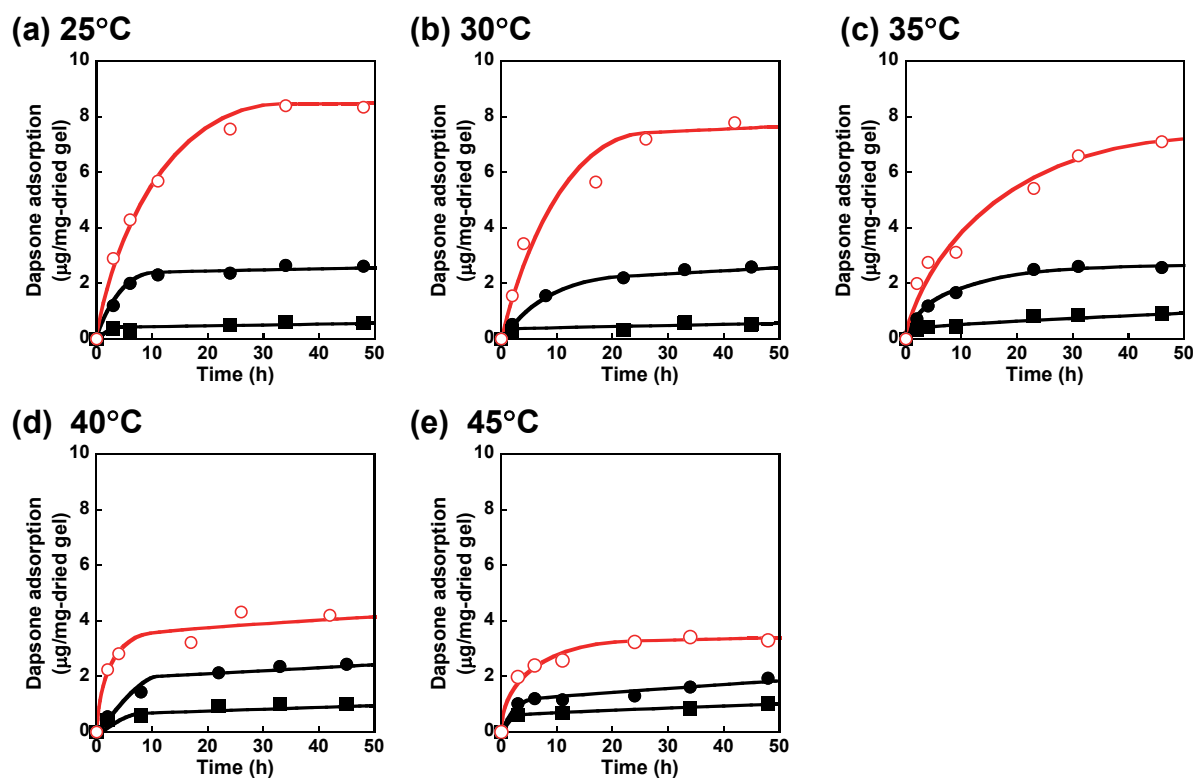

Fig. S7. Adsorption profiles of dapsone into the MIP (○), NIP (●) and PNIPAAm (■) hydrogels in aqueous dapsone solution (0.035 mM) at (a) 25, (b) 30, (c) 35, (d) 40 and (e) 45 °C.

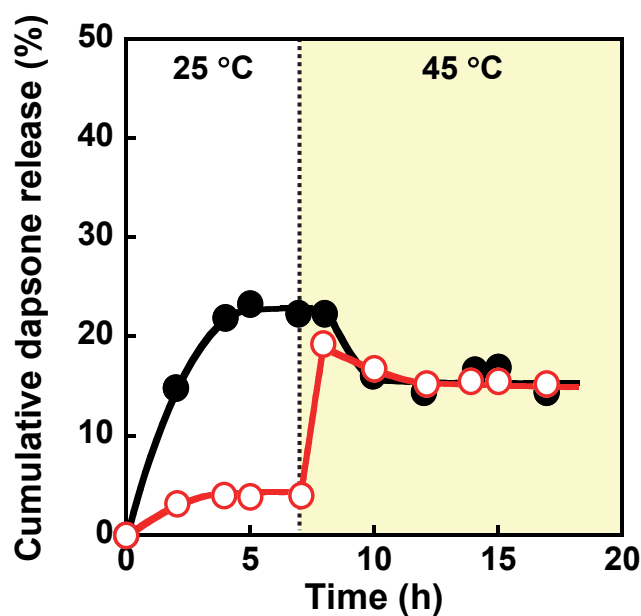

Fig. S8. Release profile of dapsone from the MIP (○) and NIP (●) hydrogels in water when the temperature was switched from 25 to 45 °C.

**Table S1. Efficient crosslinking density of (a) MIP, (b) NIP and (c) PNIPAAm hydrogels.**

|                      | Crosslinking density (mol/m <sup>3</sup> ) |             |                     |
|----------------------|--------------------------------------------|-------------|---------------------|
|                      | Water                                      | Dapsone aq. | Change ( $\Delta$ ) |
| (a) MIP hydrogel     | 4.47                                       | 5.99        | 1.52                |
| (b) NIP hydrogel     | 5.49                                       | 5.83        | 0.34                |
| (c) PNIPAAm hydrogel | 5.28                                       | 5.36        | 0.08                |
